# Supplementary material for: Promotion of Cell Death in Cisplatin-Resistant Ovarian Cancer Cells through KDM1B-DCLRE1B Modulation
Source: PubMed Central journal article supplement (PMC6566920; doi:10.3390/ijms20102443), 2019-05-17
Supplement: ijms-20-02443-s001.pdf [file ijms-20-02443-s001.pdf]

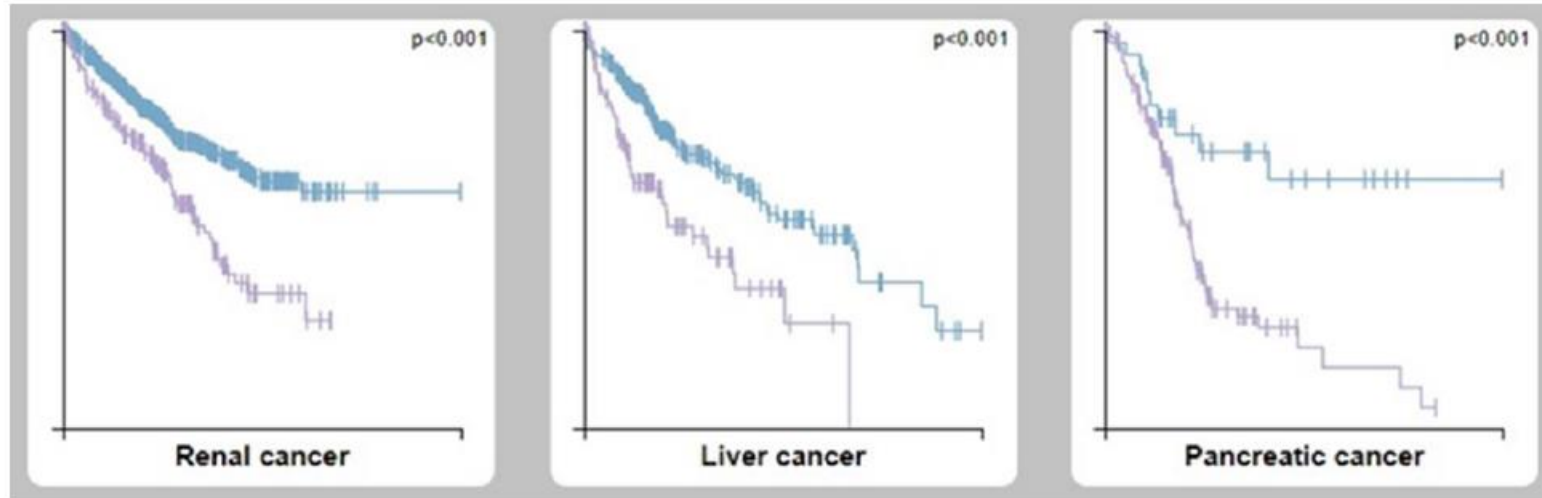

**Figure S1.** Pathology aspect of DCLRE1B gene. Significant association ( $p < 0.01$ ) with patient survival rate between cancers and high expression of DCLRE1B are shown as Kaplan-Meier plots using pathology data from protein atlas (v17.proteinatlas.org). In renal, liver and pancreatic cancer, prognosis shows as unfavourable. Whether the prognosis is favourable or unfavourable is indicated in brackets.
